# Supplementary material
Source: PubMed Central journal article supplement (PMC4975979)
Supplement: NIHMS795008-supplement-1.pdf [file NIHMS795008-supplement-1.pdf]

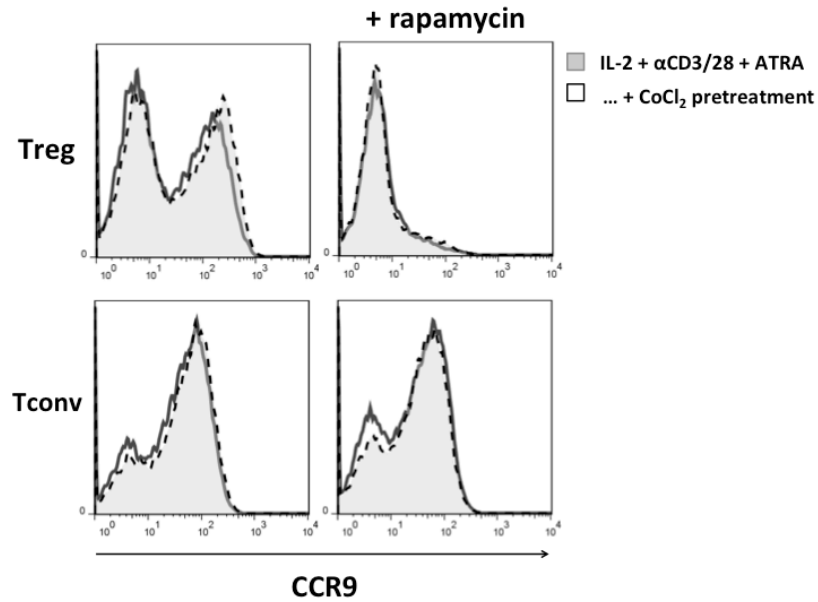

**Supplementary Figure 1. The HIF-1 $\alpha$  inducer/hypoxia mimetic CoCl<sub>2</sub> does not alter the proportion of ATRA-expanded CCR9<sup>+</sup> versus CCR9<sup>-</sup> cells.** Freshly-isolated Treg were cultured for 3-5 days in IL-2/ $\alpha$ CD3/ $\alpha$ CD28 in the presence of ATRA, with or without CoCl<sub>2</sub> pretreatment.
